# Supplementary material
Source: publisher site journal article supplement (https://www.dovepress.com/article/593214)
Supplement: Supplementary file 1 [file 593214%20Supplementary%20Tables%201-4.pdf]

**Supplementary Table S1.** List of 1787 inflammatory response-associated genes from MSigDB.

| <b>Gene Symbol</b> |
|--------------------|
| CEBPB              |
| SERPINA3           |
| CNR1               |
| REG3G              |
| CRP                |
| EDNRB              |
| AHSG               |
| A2M                |
| EPO                |
| F2                 |
| F8                 |
| FN1                |
| APOL2              |
| MRGPRX1            |
| HFE                |
| HP                 |
| APCS               |
| IL1A               |
| IL1B               |
| IL6                |
| IL6R               |
| INS                |
| ITIH4              |
| LBP                |
| MBL2               |
| ASS1               |
| ORM1               |
| ORM2               |
| IL22               |
| REG3A              |
| SERPINA1           |
| SERPINF2           |
| PLSCR1             |
| UGT1A1             |
| PTGER3             |
| PTGS2              |
| SIGIRR             |
| SAA1               |
| SAA2               |
| SAA4               |
| TFR2               |
| TFRC               |
| TNF                |
| TRPV1              |

|           |
|-----------|
| TNFSF11   |
| TNFRSF11A |
| CD163     |
| PTGES     |
| MIR302E   |
| PARK7     |
| CCR7      |
| IL31RA    |
| NLRP6     |
| ELANE     |
| EXT1      |
| FCER1A    |
| FCGR1A    |
| FCGR2B    |
| FCGR3A    |
| FUT7      |
| PLA2G2D   |
| HLA-E     |
| IGHG1     |
| CXCR2     |
| NPY5R     |
| IL20RB    |
| SELENOS   |
| SPN       |
| BTK       |
| C3        |
| ZP3       |
| CD6       |
| RASGRP1   |
| MIR6869   |
| PLK2      |
| CYSLTR1   |
| TREX1     |
| MAPK14    |
| FGR       |
| KDM6B     |
| FOSL2     |
| MKRN2     |
| FYN       |
| IL36RN    |
| IL36B     |
| IL37      |
| IL36A     |
| GPR17     |
| GPX1      |
| HCK       |
| HLA-DRB1  |
| HMGB1     |

|          |
|----------|
| HMGB2    |
| RBPJ     |
| IL1RN    |
| IL2RA    |
| IL5RA    |
| IL10     |
| IL12B    |
| KARS1    |
| RAB44    |
| LTA      |
| LYN      |
| MIR105-1 |
| MIR19A   |
| MIR19B1  |
| NOTCH1   |
| NOTCH2   |
| FURIN    |
| PLCG1    |
| TREM2    |
| IL36G    |
| PSMA1    |
| PSMB4    |
| NOD2     |
| IL25     |
| SRC      |
| SYK      |
| YES1     |
| RHBDF2   |
| IL1F10   |
| PNMA1    |
| CD28     |
| CD68     |
| CD81     |
| ADAM8    |
| TNIP1    |
| CEBPA    |
| CTSC     |
| NLRP3    |
| LRRK2    |
| ADORA2B  |
| C2CD4A   |
| DDT      |
| DHX9     |
| AGT      |
| AGTR1    |
| ETS1     |
| FABP4    |
| NAPEPLD  |

|          |
|----------|
| NLRP1    |
| IL17RA   |
| ALOX5AP  |
| DEFB114  |
| STAP1    |
| NUPR1    |
| PDCD4    |
| GPR4     |
| NEAT1    |
| TAF3     |
| FFAR3    |
| FFAR2    |
| GRN      |
| PYCARD   |
| NLRP10   |
| IFI35    |
| IFNG     |
| APP      |
| LILRA5   |
| IL2      |
| IL6ST    |
| IL15     |
| IL16     |
| IL18     |
| IDO1     |
| C2CD4B   |
| LDLR     |
| LGALS1   |
| LGALS2   |
| LPL      |
| MIR126   |
| MIR128-1 |
| MIR142   |
| MIR144   |
| MIR181B1 |
| MIR206   |
| MIR21    |
| MIR22    |
| MIR92A1  |
| MDK      |
| MEFV     |
| MGST2    |
| MMP8     |
| ABCC1    |
| NAIP     |
| NFKBIA   |
| NINJ1    |
| NKG7     |

|          |
|----------|
| OSM      |
| PLA2G3   |
| SERPINE1 |
| TLR7     |
| PDE2A    |
| IL23A    |
| GPRC5B   |
| PIK3CG   |
| PLA2G2A  |
| PLCG2    |
| SETD4    |
| TLR9     |
| CAMK2N1  |
| FEM1A    |
| MAPK13   |
| SUCNR1   |
| PTGER4   |
| NLRC4    |
| IL21     |
| TRPV4    |
| RPS19    |
| S100A8   |
| S100A9   |
| S100A12  |
| CCL1     |
| CCL3     |
| CCL24    |
| CX3CL1   |
| GPSM3    |
| NFKBIZ   |
| SNCA     |
| STAT5B   |
| VAMP7    |
| TGFB1    |
| TLR2     |
| TLR3     |
| TLR4     |
| TNFRSF1A |
| TNFSF4   |
| CCR2     |
| WNT5A    |
| PLA2G7   |
| GSDMD    |
| ZBP1     |
| CASP1    |
| CASP4    |
| TTBK1    |
| CREB3L3  |

|         |
|---------|
| TSLP    |
| VAMP8   |
| HYAL2   |
| TRADD   |
| SNX4    |
| RIPK1   |
| CCN4    |
| TNFSF18 |
| IL33    |
| NMI     |
| NLRP12  |
| IL1RL1  |
| OSMR    |
| AIM2    |
| CLOCK   |
| CD47    |
| ADA     |
| MIR920  |
| CDH5    |
| MIR4286 |
| MIR3909 |
| NR1H3   |
| LPCAT3  |
| DUSP10  |
| CHRNA7  |
| C1QTNF3 |
| IL22RA2 |
| CD200R1 |
| ADORA1  |
| ADORA2A |
| SIRPA   |
| LRFN5   |
| PYDC2   |
| CYLD    |
| CYP19A1 |
| AHR     |
| NLRC3   |
| ELF4    |
| TRIM65  |
| EXTL3   |
| FOXF1   |
| SYT11   |
| FPR2    |
| ALOX5   |
| GATA3   |
| GBA1    |
| GHSR    |
| SMPDL3B |

|          |
|----------|
| RABGEF1  |
| METRNL   |
| CXCL17   |
| GP1R     |
| GP3R     |
| GP2R     |
| GIT1     |
| GSTP1    |
| HGF      |
| AOAH     |
| APOA1    |
| FFAR4    |
| IRGM     |
| IGF1     |
| APOE     |
| IL4      |
| IL10RA   |
| IL13     |
| IL17A    |
| ISL1     |
| KRT1     |
| C1QTNF12 |
| ARNT     |
| MIRLET7G |
| MIR138-1 |
| MIR141   |
| MIR145   |
| MIR146A  |
| MIR149   |
| MIR15A   |
| MIR15B   |
| MIR16-1  |
| MIR181A2 |
| MIR181C  |
| MIR187   |
| MIR195   |
| MIR199A1 |
| MIR20A   |
| MIR204   |
| MIR205   |
| MIR221   |
| MIR222   |
| MIR223   |
| MIR26A1  |
| MIR30C2  |
| MIR31    |
| SMAD3    |
| CD200    |

|           |
|-----------|
| MVK       |
| NFKB1     |
| CCN3      |
| NT5E      |
| FOXP3     |
| ENPP3     |
| GHRL      |
| ACP5      |
| PPARA     |
| PPARD     |
| PPARG     |
| VPS35     |
| PRKCD     |
| ASH1L     |
| PBK       |
| MAPK7     |
| PROC      |
| MMP26     |
| SLAMF8    |
| PTGIS     |
| MIR488    |
| PTPN2     |
| PTPN6     |
| HAMP      |
| PTPRC     |
| WFDC1     |
| IL22RA1   |
| RB1       |
| RORA      |
| BCR       |
| SLC39A8   |
| FNDC4     |
| SOD1      |
| STAT3     |
| MIR590    |
| TEK       |
| TNFAIP3   |
| TNFAIP6   |
| TNFRSF1B  |
| TYRO3     |
| ACOD1     |
| ZFP36     |
| MIR766    |
| TNFAIP8L2 |
| NLRX1     |
| TRIM45    |
| NDFIP1    |
| FXR1      |

|          |
|----------|
| SHARPIN  |
| PLA2G10  |
| CST7     |
| IER3     |
| SIGLEC10 |
| PGLYRP1  |
| SOCS3    |
| OTULIN   |
| MACIR    |
| MFHAS1   |
| KLF4     |
| ADIPOQ   |
| NR1D1    |
| SOCS5    |
| NR1H4    |
| NR1D2    |
| C6       |
| ICAM1    |
| ITGB2    |
| CXCL8    |
| C7       |
| ITGA4    |
| KNG1     |
| VCAM1    |
| ITGAL    |
| SELPLG   |
| C5       |
| ITGB1    |
| SELP     |
| ABCA1    |
| ABI1     |
| ACVR1B   |
| ACVR2A   |
| ADM      |
| ADRM1    |
| APLNR    |
| AQP9     |
| ATP2A2   |
| ATP2B1   |
| ATP2C1   |
| AXL      |
| BDKRB1   |
| BEST1    |
| BST2     |
| BTG2     |
| C3AR1    |
| C5AR1    |
| CALCRL   |

|         |
|---------|
| CCL17   |
| CCL2    |
| CCL20   |
| CCL22   |
| CCL5    |
| CCL7    |
| CCRL2   |
| CD14    |
| CD40    |
| CD48    |
| CD55    |
| CD69    |
| CD70    |
| CD82    |
| CDKN1A  |
| CHST2   |
| CLEC5A  |
| CMKLR1  |
| CSF1    |
| CSF3    |
| CSF3R   |
| CXCL10  |
| CXCL11  |
| CXCL6   |
| CXCL9   |
| CXCR6   |
| CYBB    |
| DCBLD2  |
| EBI3    |
| EDN1    |
| EIF2AK2 |
| EMP3    |
| ADGRE1  |
| EREG    |
| F3      |
| FPR1    |
| FZD5    |
| GABBR1  |
| GCH1    |
| GNA15   |
| GNAI3   |
| GP1BA   |
| GPC3    |
| GPR132  |
| GPR183  |
| HAS2    |
| HBEGF   |
| HIF1A   |

|         |
|---------|
| HPN     |
| HRH1    |
| ICAM4   |
| ICOSLG  |
| IFITM1  |
| IFNAR1  |
| IFNGR2  |
| IL15RA  |
| IL18R1  |
| IL18RAP |
| IL1R1   |
| IL2RB   |
| IL4R    |
| IL7R    |
| INHBA   |
| IRAK2   |
| IRF1    |
| IRF7    |
| ITGA5   |
| ITGB3   |
| ITGB8   |
| KCNA3   |
| KCNJ2   |
| KCNMB2  |
| KIF1B   |
| KLF6    |
| LAMP3   |
| LCK     |
| LCP2    |
| LIF     |
| LPAR1   |
| LY6E    |
| MARCO   |
| MEP1A   |
| MET     |
| MMP14   |
| MSR1    |
| MXD1    |
| MYC     |
| NAMPT   |
| NDP     |
| NMUR1   |
| NPFFR2  |
| OLR1    |
| OPRK1   |
| P2RX4   |
| P2RX7   |
| P2RY2   |

|         |
|---------|
| PCDH7   |
| PDE4B   |
| PDPN    |
| PIK3R5  |
| PLAUR   |
| PROK2   |
| PSEN1   |
| PTAFR   |
| PTGER2  |
| PTGIR   |
| PTPRE   |
| PVR     |
| RAF1    |
| RELA    |
| RGS1    |
| RGS16   |
| RHOG    |
| RIPK2   |
| RNF144B |
| ROS1    |
| RTP4    |
| SCARF1  |
| SCN1B   |
| SELE    |
| SELL    |
| SEMA4D  |
| SGMS2   |
| SLAMF1  |
| SLC11A2 |
| SLC1A2  |
| SLC28A2 |
| SLC31A1 |
| SLC31A2 |
| SLC4A4  |
| SLC7A1  |
| SLC7A2  |
| SPHK1   |
| SRI     |
| STAB1   |
| TACR1   |
| TACR3   |
| TAPBP   |
| TIMP1   |
| TLR1    |
| TNFRSF9 |
| TNFSF10 |
| TNFSF15 |
| TNFSF9  |

|           |
|-----------|
| TPBG      |
| VIP       |
| RNU7-1    |
| RNU4ATAC  |
| TOM1      |
| ABCC9     |
| IL18BP    |
| ARPC1B    |
| NOTCH2NLC |
| BCAP31    |
| AASS      |
| SLC25A13  |
| SLC25A15  |
| IL12A-AS1 |
| PRG4      |
| GPHN      |
| CDKN1B    |
| STUB1     |
| APC2      |
| ADAR      |
| CCNO      |
| TCIRG1    |
| IKZF1     |
| TFG       |
| CITED2    |
| IRF9      |
| CDSN      |
| SEC23B    |
| FBLN5     |
| CIB1      |
| DEAF1     |
| HYOU1     |
| IPO8      |
| CEBPE     |
| RNASEH2A  |
| PERCC1    |
| AGR2      |
| AGPAT2    |
| SPTLC1    |
| SLC35A1   |
| RBCK1     |
| IVNS1ABP  |
| EBP       |
| STAG2     |
| RAI1      |
| MASP2     |
| GIPC1     |
| TRAF3IP2  |

|           |
|-----------|
| CFTR      |
| GJB6      |
| SDCCAG8   |
| CPLX1     |
| CEACAM3   |
| SRCAP     |
| MALT1     |
| EDAR      |
| SLC27A4   |
| SPINK5    |
| TLK2      |
| POLR3A    |
| KPTN      |
| CORO1A    |
| SLC6A14   |
| IL17F     |
| LYST      |
| ADAT3     |
| CHST14    |
| TMC6      |
| KIF12     |
| CTRC      |
| BUD23     |
| MYSM1     |
| SLC26A9   |
| LRRC56    |
| TNFRSF13C |
| ODAD3     |
| ERCC8     |
| AP2S1     |
| CLCN7     |
| CLCNKB    |
| CLN3      |
| SDR9C7    |
| KRT74     |
| CCR1      |
| DNAAF1    |
| CYP4F22   |
| KDF1      |
| B3GALT6   |
| GJB4      |
| COL2A1    |
| COL3A1    |
| EDARADD   |
| COL4A3    |
| COL4A4    |
| COL4A5    |
| COL4A6    |

|         |
|---------|
| COL5A1  |
| COL5A2  |
| COL7A1  |
| COL11A1 |
| COL11A2 |
| AP1S3   |
| COL17A1 |
| COMT    |
| COPA    |
| NADK2   |
| DNAJC21 |
| LSM11   |
| CPA1    |
| TMEM270 |
| MPLKIP  |
| CR2     |
| CREBBP  |
| DNAAF6  |
| CSF2RA  |
| CSF2RB  |
| A2ML1   |
| LACC1   |
| CARMIL2 |
| CFAP52  |
| TMC8    |
| CCBE1   |
| CST6    |
| CSTA    |
| TICAM1  |
| NKX2-5  |
| CTBP1   |
| IL23R   |
| CTLA4   |
| CTNNB1  |
| CTSB    |
| ASPRV1  |
| NEK10   |
| CYBA    |
| METTL27 |
| VPS37D  |
| CYP7A1  |
| CYP11B1 |
| AARS1   |
| DNAAF4  |
| AP1B1   |
| DBT     |
| DDB1    |
| DDB2    |

|          |
|----------|
| AEBP1    |
| RNF168   |
| TIMM8A   |
| GLIS3    |
| ASXL1    |
| DHCR7    |
| DKC1     |
| DLG1     |
| DLX4     |
| AGA      |
| DNAH5    |
| DNAH9    |
| DNASE1   |
| DNASE1L3 |
| DNASE2   |
| DNMT1    |
| DNMT3B   |
| DOCK2    |
| ATN1     |
| DSG1     |
| ECM1     |
| EDA      |
| EDNRA    |
| EGFR     |
| ARID2    |
| DZIP1L   |
| CFAP221  |
| ELN      |
| UNC13D   |
| EMP2     |
| EN1      |
| LGI3     |
| EP300    |
| EPB42    |
| ANO5     |
| AK2      |
| CERS3    |
| EPHB4    |
| C2orf69  |
| ERCC1    |
| ERCC2    |
| AKT1     |
| ERCC3    |
| ERCC4    |
| ERCC5    |
| ERCC6    |
| ERF      |
| ESR1     |

|         |
|---------|
| ABCA3   |
| ABCD1   |
| F5      |
| F13A1   |
| F13B    |
| BPTF    |
| FANCF   |
| MPEG1   |
| FBN1    |
| ATOH7   |
| MS4A2   |
| JMJD1C  |
| FCGR2A  |
| RSPH9   |
| FCGR3B  |
| JAZF1   |
| FECH    |
| ALDH3A2 |
| FGA     |
| FGF3    |
| FGF8    |
| FGF10   |
| FGFR1   |
| FGFR3   |
| FGFR2   |
| FH      |
| RRAS2   |
| CLCA4   |
| IKZF3   |
| COBLL1  |
| DOLK    |
| MORC2   |
| CARD8   |
| CCT5    |
| PLCH1   |
| FOXJ1   |
| FOXC2   |
| IQSEC2  |
| TBC1D2B |
| TNRC6B  |
| FLG     |
| PLXND1  |
| FLI1    |
| FLII    |
| FCHO1   |
| CIC     |
| FLNA    |
| NUP205  |

|           |
|-----------|
| LPIN1     |
| GANAB     |
| FLT4      |
| NUP160    |
| FMO3      |
| FMR1      |
| NCSTN     |
| SIK3      |
| SF3B1     |
| BRD4      |
| TGDS      |
| TNFRSF13B |
| DAAM2     |
| POFUT1    |
| TNPO3     |
| PIGN      |
| LEMD3     |
| ORC6      |
| AMACR     |
| CD2AP     |
| DNAAF11   |
| SHPK      |
| ALOX12B   |
| GAS2L2    |
| KDSR      |
| FZD2      |
| G6PC1     |
| SLC37A4   |
| CFAP45    |
| NIPBL     |
| GALNS     |
| RTTN      |
| ATL3      |
| SAMHD1    |
| SIN3A     |
| KANK2     |
| MMACHC    |
| DNAH1     |
| TKFC      |
| SETBP1    |
| AUTS2     |
| GAPVD1    |
| LRRC32    |
| ABCA12    |
| IFT172    |
| GAS1      |
| PTPN22    |
| GAS8      |

|          |
|----------|
| PHGDH    |
| GATA1    |
| GATA2    |
| BLOC1S6  |
| GATA4    |
| GATA6    |
| VPS33B   |
| TINF2    |
| GCGR     |
| BSCL2    |
| TBL2     |
| RNU12    |
| GFI1     |
| GGT1     |
| B4GALT1  |
| OPLAH    |
| NBEA     |
| GJA1     |
| DNAI1    |
| FOXD3    |
| LAT      |
| GJB2     |
| GJB3     |
| FOXP1    |
| GK       |
| AFF4     |
| STK36    |
| GLB1     |
| GCLC     |
| GLI2     |
| GLRA1    |
| GLRA2    |
| GLRB     |
| GNA11    |
| GNAQ     |
| GNAS     |
| GNB2     |
| GNS      |
| GP1BB    |
| PGM2L1   |
| MYO1H    |
| KANSL1   |
| CAVIN1   |
| KCTD1    |
| ANGPT2   |
| DLL1     |
| SH3PXD2B |
| PNPLA1   |

|           |
|-----------|
| GPR35     |
| ANK1      |
| NSMCE2    |
| CRB2      |
| TRAC      |
| GRB10     |
| OSTM1     |
| FLVCR1    |
| SETD2     |
| NR3C1     |
| ANKRD11   |
| GSN       |
| GSTM3     |
| GTF2E2    |
| GTF2I     |
| BLNK      |
| CARD10    |
| GUCY2C    |
| ICOS      |
| ALG5      |
| SNX10     |
| GUSB      |
| DSE       |
| SLC25A24  |
| LRP12     |
| EFEMP2    |
| SH3KBP1   |
| H3-3B     |
| HBA1      |
| HBA2      |
| HBB       |
| NCKAP1L   |
| HGD       |
| HLA-A     |
| HLA-B     |
| HLA-C     |
| MNX1      |
| HLA-DPA1  |
| HLA-DPB1  |
| HLA-DQA1  |
| HLA-DQB1  |
| HLCS      |
| HMGCL     |
| HMOX1     |
| HNRNPA2B1 |
| HOXA13    |
| APC       |
| HPGD      |

|         |
|---------|
| HPS1    |
| AIRE    |
| BIRC3   |
| XIAP    |
| HSPA9   |
| IGSF3   |
| HYAL1   |
| IARS1   |
| UBAC2   |
| GPIHBP1 |
| IRF8    |
| CCDC39  |
| SLC6A19 |
| STING1  |
| HEPHL1  |
| IDH1    |
| IDS     |
| IDUA    |
| CFI     |
| SP110   |
| APOC2   |
| MCIDAS  |
| RSPH4A  |
| IFNGR1  |
| IGBP1   |
| IGF2R   |
| NIPAL4  |
| IGHG2   |
| IGHM    |
| IGKC    |
| DNAAF3  |
| RILPL1  |
| IPLL1   |
| FAS     |
| IKBKB   |
| FASLG   |
| IL2RG   |
| IL7     |
| IL10RB  |
| IL11RA  |
| IL12A   |
| IL12RB1 |
| IRF2BP2 |
| IRAK1   |
| ITGA6   |
| IRF4    |
| IRF5    |
| IRF6    |

|         |
|---------|
| AR      |
| ITGA7   |
| ABCC6   |
| ITGAM   |
| ITGB4   |
| ACADVL  |
| ITK     |
| JAK1    |
| JAK2    |
| JAK3    |
| FAM111B |
| DNAJB13 |
| ZNF699  |
| MIA3    |
| KCNJ6   |
| KCNN4   |
| NHLRC1  |
| KIT     |
| KIF11   |
| KRT5    |
| KRT10   |
| KRT14   |
| KRT17   |
| KRT18   |
| RTL1    |
| CCDC103 |
| FLG2    |
| LAMA2   |
| LAMA3   |
| LAMB3   |
| LAMC2   |
| LBR     |
| LDHA    |
| LEP     |
| LETM1   |
| ARHGDIA |
| LHCGR   |
| LIG1    |
| LIG4    |
| LIMK1   |
| RHOH    |
| LMNA    |
| LMNB1   |
| LMX1B   |
| GTF2H5  |
| LSS     |
| LTBP1   |
| LTBP3   |

|         |
|---------|
| SH2D1A  |
| LYZ     |
| EPCAM   |
| MAB21L1 |
| MAF     |
| ARSB    |
| MAN2B1  |
| MDM4    |
| MECP2   |
| ARVCF   |
| MEIS2   |
| MEN1    |
| MGP     |
| CIITA   |
| ASAH1   |
| MID1    |
| MIF     |
| KMT2A   |
| MME     |
| MMP1    |
| MPV17   |
| MSN     |
| MST1    |
| MSX1    |
| MTAP    |
| MT-CO1  |
| MT-CO2  |
| MT-CO3  |
| MTHFD1  |
| MTM1    |
| MT-ND1  |
| MT-ND4  |
| MT-ND5  |
| MT-ND6  |
| MTTP    |
| MT-TF   |
| MT-TH   |
| MT-TL1  |
| MT-TQ   |
| MT-TS1  |
| MT-TS2  |
| MT-TW   |
| MMUT    |
| MYCN    |
| MYD88   |
| MYH6    |
| MYH9    |
| MYH11   |

|          |
|----------|
| MYL2     |
| MYO1E    |
| CEACAM6  |
| NBN      |
| NCF2     |
| NCF4     |
| NDUFA6   |
| ATM      |
| NDUFS3   |
| NF1      |
| NFE2L2   |
| NFIX     |
| NFKB2    |
| TONSL    |
| NGF      |
| NODAL    |
| NOS1     |
| PNP      |
| NPHS1    |
| NPM1     |
| NTRK1    |
| ROR2     |
| DDR2     |
| NUMA1    |
| OCRL     |
| PAFAH1B1 |
| SMARCAL1 |
| PAH      |
| IL21R    |
| DEF6     |
| PARN     |
| PAX1     |
| PAX2     |
| PAX6     |
| CDON     |
| PDE11A   |
| PCCA     |
| PCCB     |
| ATL1     |
| MLXIPL   |
| KMT5B    |
| SBDS     |
| DCTN4    |
| PLCE1    |
| PCYT1A   |
| TLR8     |
| NME8     |
| PDCD1    |

|          |
|----------|
| ZBTB7A   |
| MBTPS2   |
| ZMYND10  |
| POMP     |
| DDX41    |
| DCDC2    |
| ANKFY1   |
| PDGFRA   |
| PDGFRL   |
| PDHA1    |
| ENPP1    |
| DNAJB11  |
| RTEL1    |
| ERAP1    |
| MAP3K20  |
| ADA2     |
| PEPD     |
| ATP8B1   |
| PGM1     |
| PGM3     |
| ABCB1    |
| ABCB4    |
| ATP6V1B2 |
| PIGA     |
| PIK3CA   |
| PIK3CD   |
| PIK3R1   |
| PI4KA    |
| PKD1     |
| PKD2     |
| PKHD1    |
| PKP1     |
| PLCD1    |
| PLEC     |
| PLG      |
| ATP6V0A1 |
| PLOD1    |
| PML      |
| PMM2     |
| ATP7A    |
| ATP7B    |
| POLA1    |
| POLE     |
| POLG     |
| POLH     |
| SOX18    |
| WNT4     |
| SASH3    |

|          |
|----------|
| ANLN     |
| RIN2     |
| RETREG1  |
| PRMT7    |
| TMCO1    |
| POU2AF1  |
| ATRX     |
| P4HTM    |
| HYDIN    |
| TET2     |
| TRPM4    |
| BNC2     |
| SAMD9    |
| ARHGEF38 |
| PIGG     |
| BCOR     |
| TBC1D8B  |
| NSUN2    |
| PXK      |
| FOCAD    |
| DNAAF5   |
| RNF125   |
| TTC12    |
| PHIP     |
| BANK1    |
| CCDC40   |
| PTCD3    |
| ODAD2    |
| WRAP53   |
| DNAAF2   |
| SMG8     |
| KIRREL1  |
| FBXW7    |
| SLC29A3  |
| MNS1     |
| SLC35C1  |
| MEG3     |
| NOP10    |
| PRF1     |
| FERMT1   |
| SLC39A4  |
| CHD7     |
| NHP2     |
| PRKACA   |
| IARS2    |
| SLF2     |
| PRKAR1A  |
| NAXD     |

|         |
|---------|
| NUP133  |
| PRKAR1B |
| INAVA   |
| LMBRD1  |
| LRIF1   |
| PSENE1  |
| HDAC8   |
| PRKDC   |
| MAPK1   |
| SMG9    |
| NSMCE3  |
| DNAH7   |
| BTNL2   |
| LRRC8A  |
| PRSS1   |
| PRSS2   |
| PRTN3   |
| CFAP298 |
| B2M     |
| SMARCA1 |
| PSMB8   |
| PSMB9   |
| POGLUT1 |
| PSMG2   |
| PSMB10  |
| KIF15   |
| CCDC47  |
| TBX20   |
| PNPLA2  |
| CYSLTR2 |
| NUP107  |
| SLURP1  |
| GJC2    |
| ZNF1    |
| PSMD12  |
| SELENON |
| TTC7A   |
| PSPH    |
| PTCH1   |
| PTEN    |
| CLTRN   |
| TBC1D24 |
| ARID1B  |
| COG6    |
| WDR35   |
| TAOK1   |
| RIC1    |
| MRTFA   |

|          |
|----------|
| DIP2B    |
| ZFAT     |
| EPG5     |
| WDR19    |
| GRHL3    |
| ACTA1    |
| PTPRO    |
| PURA     |
| NECTIN1  |
| ALDH18A1 |
| RAC1     |
| RAC2     |
| RAD21    |
| RAG1     |
| RAG2     |
| RANBP2   |
| RARA     |
| BCKDHA   |
| PRDM12   |
| ALOXE3   |
| BCKDHB   |
| RBP4     |
| RECQL    |
| REL      |
| RELB     |
| DPF2     |
| RET      |
| REV3L    |
| RFC2     |
| RFX5     |
| RFXAP    |
| RIT1     |
| RMRP     |
| RNF2     |
| BACH2    |
| TRAPPC11 |
| RORC     |
| RPGR     |
| RPL11    |
| BCS1L    |
| RREB1    |
| RYR1     |
| CFB      |
| SAT1     |
| MSMO1    |
| SCN9A    |
| SCNN1A   |
| SCNN1B   |

|         |
|---------|
| SCNN1G  |
| SDHA    |
| VIPAS39 |
| SDHB    |
| SDHC    |
| SDHD    |
| CIDEC   |
| XPNPEP3 |
| TRAPPC2 |
| BLK     |
| CDH23   |
| MCCC2   |
| BLM     |
| XYLT1   |
| IFIH1   |
| CARD9   |
| SRSF2   |
| NSD1    |
| LIPN    |
| NXN     |
| SFTPB   |
| SFTPC   |
| DCLRE1C |
| INF2    |
| DNAI2   |
| SGCG    |
| CLEC7A  |
| ANAPC1  |
| SHH     |
| SIAH1   |
| LMF1    |
| DCLRE1B |
| NABP1   |
| RFX7    |
| STIL    |
| BCL11B  |
| SIX3    |
| SKIC2   |
| VPS33A  |
| BMP4    |
| SLC4A1  |
| NCF1    |
| SLC9A3  |
| SLC11A1 |
| SLC12A3 |
| SLCO2A1 |
| SMARCA2 |
| SMARCA4 |

|         |
|---------|
| SMARCB1 |
| SMARCC2 |
| SMARCD1 |
| SMARCD2 |
| SMARCE1 |
| SOX4    |
| SOX11   |
| SPAG1   |
| SPI1    |
| SPIB    |
| SPINK1  |
| SPP1    |
| SPTA1   |
| SPTB    |
| SPTBN1  |
| AKR1D1  |
| BRCA1   |
| SREBF1  |
| SRP19   |
| SRP54   |
| BRAF    |
| SRY     |
| ST14    |
| STAT1   |
| STAT2   |
| STAT4   |
| ELOVL4  |
| STK4    |
| STX1A   |
| STXBP1  |
| STXBP2  |
| SULT2B1 |
| SUOX    |
| BTD     |
| ADAM17  |
| TAF1    |
| MAP3K7  |
| TAP1    |
| TAP2    |
| TARS1   |
| TBX1    |
| TBCD    |
| TBX2    |
| TCF4    |
| TCF3    |
| ZEB1    |
| MLX     |
| TDGF1   |

|        |
|--------|
| ACTC1  |
| TERC   |
| TERT   |
| TFE3   |
| TG     |
| TGFB2  |
| TGFB3  |
| TGFBR1 |
| TGFBR2 |
| TGIF1  |
| TGM1   |
| NKX2-1 |
| TK2    |
| TKT    |
| TLL1   |
| C1QA   |
| C1QB   |
| C1QC   |
| C1R    |
| TOP3A  |
| TP53   |
| C1S    |
| TP73   |
| TPM2   |
| TPM3   |
| TPP2   |
| TPR    |
| TRAF6  |
| ACTG2  |
| C4A    |
| C4B    |
| TRPC6  |
| CAPN5  |
| HIRA   |
| TYMS   |
| UBB    |
| UBA1   |
| UBE2A  |
| UBE2L3 |
| UFD1   |
| UMOD   |
| UNG    |
| UQCRH  |
| UROD   |
| UROS   |
| KDM6A  |
| WAS    |
| WIPF1  |

|           |
|-----------|
| EIF4H     |
| CLIP2     |
| NSD2      |
| NELFA     |
| WT1       |
| XDH       |
| XPA       |
| XPC       |
| ZAP70     |
| ZIC2      |
| CFAP410   |
| ZBTB16    |
| RNF113A   |
| CACNA1C   |
| SLC30A2   |
| NPHS2     |
| ALMS1     |
| CXCR4     |
| RAB7A     |
| NUP37     |
| ALG12     |
| CARD14    |
| GNPTAB    |
| SLC39A7   |
| MMEL1     |
| CYBC1     |
| EPM2A     |
| CDC73     |
| RNASEH2B  |
| EFL1      |
| FAT4      |
| SRD5A3    |
| USB1      |
| TBL1XR1   |
| ANKRD55   |
| ZNF750    |
| ALG9      |
| ARMC5     |
| CSPP1     |
| NUP85     |
| SPEF2     |
| KIAA0319L |
| COQ8B     |
| KAT6A     |
| PANK2     |
| BICC1     |
| CTC1      |
| WDR26     |

|          |
|----------|
| HSD3B7   |
| SHOC2    |
| KMT2D    |
| ACTN4    |
| SLC2A10  |
| CALR     |
| CFHR5    |
| CLPB     |
| CAMK2B   |
| TRIM8    |
| FIP1L1   |
| DOCK8    |
| MED25    |
| CLTCL1   |
| SMC1A    |
| CAPN3    |
| NAA10    |
| LAGE3    |
| ARID1A   |
| KLRC4    |
| AXIN1    |
| BAP1     |
| CDC45    |
| CARS1    |
| ARHGAP24 |
| ODAD4    |
| DNAL1    |
| GPR101   |
| H4C3     |
| H4C5     |
| FERMT3   |
| ITCH     |
| NME5     |
| USP26    |
| RSPH3    |
| PLA2G6   |
| OBSCN    |
| MAGT1    |
| CASP8    |
| RNASEH2C |
| GTF2IRD2 |
| USP48    |
| LTBP4    |
| DNAJC30  |
| CASP10   |
| COG8     |
| CARD11   |
| MEGF10   |

|          |
|----------|
| JAGN1    |
| FOXN1    |
| CASR     |
| FKBP6    |
| CAT      |
| COX4I2   |
| OFD1     |
| IL17RC   |
| LMNB2    |
| HAVCR2   |
| ORAI1    |
| ATAD1    |
| ZNF341   |
| DISP1    |
| PIGY     |
| CFAP300  |
| IKBKG    |
| DGKE     |
| SHANK3   |
| APOL1    |
| CFAP74   |
| AP3B1    |
| FCN3     |
| CCDC65   |
| CDK10    |
| CAV1     |
| RUNX2    |
| SLC25A12 |
| RUNX1    |
| RFXANK   |
| TP63     |
| ABCB11   |
| SOCS1    |
| CBL      |
| STX16    |
| STX11    |
| DNAH11   |
| SERPINH1 |
| TNFSF12  |
| CBS      |
| DLK1     |
| NAE1     |
| CACNA1G  |
| BCL10    |
| FOXH1    |
| KYNU     |
| P4HA2    |
| RSPH1    |

|          |
|----------|
| BAZ1B    |
| KNSTRN   |
| AIP      |
| PSTPIP1  |
| NFS1     |
| SLC7A7   |
| PAPSS2   |
| CLDN1    |
| UNC119   |
| TBX19    |
| USP8     |
| DPP9     |
| SMC3     |
| CD3D     |
| SLC6A5   |
| CD3E     |
| CD3G     |
| NEK9     |
| ARHGEF2  |
| CD247    |
| CD4      |
| HACD1    |
| GORAB    |
| CRLF1    |
| G6PC3    |
| DRC1     |
| BCL7B    |
| MARS2    |
| CD19     |
| MS4A1    |
| ODAD1    |
| TGM5     |
| SNAP29   |
| LONP1    |
| TBCK     |
| CD27     |
| ARHGAP29 |
| CYP7B1   |
| TBX4     |
| ADAMTS3  |
| ADAMTS2  |
| SPTLC2   |
| MPDU1    |
| H6PD     |
| GTF2IRD1 |
| CDC42BPB |
| CD40LG   |
| SEC24C   |

|          |
|----------|
| FNIP1    |
| SKIC3    |
| LPIN2    |
| NUP93    |
| PRORP    |
| ADAMTSL2 |
| CD79A    |
| CD79B    |
| IFT140   |
| HDAC4    |
| CD151    |
| PIEZO1   |
| KIAA0586 |
| GINS1    |
| ZEB2     |
| ZBTB24   |
| PLEKHM1  |
| MAGI2    |
| LRBA     |
| FIG4     |
| RBM8A    |
| WDR1     |
| MED12    |
| CDH1     |
| COL1A1   |
| COL1A2   |
| IL5      |
| LAMA5    |
| LAMB1    |
| LAMB2    |
| LAMC1    |
| THBS1    |
| THBS3    |
| VTN      |
| CD80     |
| CD86     |
| CXCL13   |
| MGLL     |
| TIRAP    |
| CCR5     |
| AGER     |
| AIF1     |
| ABCF1    |
| FOS      |
| ALOX15   |
| CXCL1    |
| CXCL2    |
| ANXA1    |

|          |
|----------|
| AOX1     |
| IL1RAP   |
| IL9      |
| LY75     |
| NFATC4   |
| PTX3     |
| BCL6     |
| BDKRB2   |
| CCL4     |
| CCL8     |
| CCL11    |
| CCL13    |
| CCL18    |
| CCL19    |
| CCL21    |
| CCL23    |
| CXCL5    |
| CXCL12   |
| TPST1    |
| AOC3     |
| LY86     |
| CXCL14   |
| MIR675   |
| TLR6     |
| LILRB4   |
| ADCY7    |
| GBP5     |
| PLD4     |
| NLRP7    |
| EPHB2    |
| EZH2     |
| ABCD2    |
| KPNA6    |
| PLD3     |
| APPL1    |
| IL17B    |
| H19      |
| APOD     |
| TICAM2   |
| MIR125A  |
| MIR129-1 |
| MIR135A1 |
| MIR136   |
| MIR140   |
| MIR17    |
| MIR197   |
| MIR203A  |
| MIR93    |

|         |
|---------|
| MIR98   |
| MIR324  |
| MIR338  |
| NOS2    |
| MIR378A |
| PER1    |
| IL17D   |
| APPL2   |
| MAPK9   |
| PSG9    |
| CHID1   |
| IL1R2   |
| CUEDC2  |
| ZC3H12A |
| SPINK7  |

**Supplementary Table S2.** Primers and RNA sequences used in this study.

| gene  | Forward primer Sequence (5'->3') | Reverse primer Sequence (5'->3') |
|-------|----------------------------------|----------------------------------|
| FOXP3 | TCCAGAGTTCCTCCACAAC              | ATTGAGTGTCCGCTGCTTCT             |
| C5AR1 | CGCTTTCTGCTGGTGTTT               | TTTGTCGTGGCTGTAGTCC              |
| LIF   | ATCACCCCTGTCAACGCCAC             | AGCTTGTCCAGGTTGTTGGG             |
| GAPDH | AGAAGGCTGGGGCTCATTTG             | AGGGGCCATCCACAGTCTTC             |

**Supplementary Table S3. Top 15 genes ranked by MCC, degree, and betweenness centrality algorithms in the PPI network**

| <b>Top 15 Ranked by MCC</b>         |        |                    |
|-------------------------------------|--------|--------------------|
| Rank                                | Name   | Score              |
| 1                                   | IL1A   | 2360               |
| 2                                   | CXCL1  | 2334               |
| 3                                   | CXCR2  | 2292               |
| 4                                   | CXCL5  | 2286               |
| 5                                   | CCL18  | 2160               |
| 6                                   | CXCL6  | 1560               |
| 7                                   | CCL22  | 1458               |
| 8                                   | FOXP3  | 745                |
| 9                                   | CCL13  | 720                |
| 10                                  | MMP1   | 151                |
| 11                                  | LIF    | 33                 |
| 12                                  | IL23A  | 32                 |
| 13                                  | C5AR1  | 20                 |
| 14                                  | C3     | 19                 |
| 15                                  | TNFSF4 | 17                 |
| <b>Top 15 Ranked by Degree</b>      |        |                    |
| Rank                                | Name   | Score              |
| 1                                   | IL1A   | 22                 |
| 2                                   | CXCL1  | 14                 |
| 2                                   | FOXP3  | 14                 |
| 4                                   | CXCR2  | 11                 |
| 5                                   | CXCL5  | 10                 |
| 5                                   | C3     | 10                 |
| 5                                   | CCL22  | 10                 |
| 8                                   | MMP1   | 9                  |
| 9                                   | CXCL6  | 8                  |
| 9                                   | C5AR1  | 8                  |
| 9                                   | LIF    | 8                  |
| 9                                   | CCL18  | 8                  |
| 9                                   | GATA1  | 8                  |
| 14                                  | TNFSF4 | 6                  |
| 14                                  | IL23A  | 6                  |
| <b>Top 15 Ranked by Betweenness</b> |        |                    |
| Rank                                | Name   | Score              |
| 1                                   | IL1A   | 1578.6925940072997 |
| 3                                   | FOXP3  | 1021.9831508360922 |
| 4                                   | C3     | 980.1734827264243  |
| 5                                   | GATA1  | 572.518767507003   |
| 6                                   | LIF    | 563.9100331041506  |
| 7                                   | C5AR1  | 545.9401493930906  |
| 8                                   | ANK1   | 537.7142857142857  |
| 9                                   | TNFSF4 | 507.8816993464053  |

|    |         |                    |
|----|---------|--------------------|
| 10 | GATA4   | 498.05985060690955 |
| 11 | LYZ     | 448.44014939309045 |
| 12 | SLC4A4  | 433.3285714285711  |
| 13 | PDPN    | 412.82936932348696 |
| 14 | CXCL1   | 355.9180205415499  |
| 15 | SLC26A9 | 281.726517273576   |

**Supplementary Table S4.** The top 10 small-molecule compounds ranked by CMap scores.

| Name           | Score  | Type | ID            | Description              |
|----------------|--------|------|---------------|--------------------------|
| bicuculline    | -96.32 | cp   | BRD-A09495397 | GABA receptor antagonist |
| vemurafenib    | -95.2  | cp   | BRD-K56343971 | RAF inhibitor            |
| PD-158780      | -93.14 | cp   | BRD-K48735772 | EGFR inhibitor           |
| indirubin      | -92.92 | cp   | BRD-K53959060 | CDK inhibitor            |
| PD-173074      | -90.98 | cp   | BRD-K97764662 | FGFR inhibitor           |
| ZM-323881      | -89.56 | cp   | BRD-K67831364 | VEGFR inhibitor          |
| TPCA-1         | -89.15 | cp   | BRD-K51575138 | IKK inhibitor            |
| 1-monopalmitin | -88.24 | cp   | BRD-A80928489 | P-glycoprotein inhibitor |
| flubendazole   | -87.89 | cp   | BRD-K86003836 | Tubulin inhibitor        |
| ABT-737        | -83.89 | cp   | BRD-K56301217 | BCL inhibitor            |
